# Supplementary material for: Lipid Peroxidation and Chlorophyll Fluorescence of Photosystem II Performance during Drought and Heat Stress is Associated with the Antioxidant Capacities of C3 Sunflower and C4 Maize Varieties
Source: MDPI journal article supplement (doi:10.3390/ijms21144846), 2020-07-09
Supplement: s1 [file s1]

**Killi et al.** “Lipid peroxidation and chlorophyll fluorescence of photosystem II performance during drought and heat stress is associated with the antioxidant capacities of C3 sunflower and C4 maize varieties”

**Supplementary Information S2.**

**Table S2; LSD Post-Hoc Test Results:**

Analysis performed; maize and sunflower separately for each antioxidant enzymes,

Maize (8 treatments) within the all sampling point.

Sunflower (8 treatments) within the all sampling point.

| Treatments | CAT    |         |       |        |         |       |        |         |       |
|------------|--------|---------|-------|--------|---------|-------|--------|---------|-------|
|            | t0     |         |       | t1     |         |       | t2     |         |       |
| 1C-TM      | 0.0054 | ±0.0006 | defgh | 0.0052 | ±0.0005 | defgh | 0.0041 | ±0.0003 | ghi   |
| 1D-TM      | 0.0054 | ±0.0006 | defgh | 0.0029 | ±0.0003 | ikl   | 0.0051 | ±0.0006 | defgh |
| 1C-SM      | 0.0069 | ±0.0005 | cd    | 0.0096 | ±0.0007 | b     | 0.0121 | ±0.0014 | a     |
| 1D-SM      | 0.0069 | ±0.0005 | cd    | 0.0049 | ±0.0006 | efgh  | 0.0043 | ±0.0007 | fghi  |
| 2C-TM      | 0.0064 | ±0.0007 | cde   | 0.0056 | ±0.0005 | defg  | 0.0040 | ±0.0005 | ghi   |
| 2D-TM      | 0.0061 | ±0.0006 | cdef  | 0.0045 | ±0.0005 | efghi | 0.0078 | ±0.0004 | c     |
| 2C-SM      | 0.0035 | ±0.0003 | hik   | 0.0044 | ±0.0008 | fghi  | 0.0016 | ±0.0002 | l     |
| 2D-SM      | 0.0036 | ±0.0003 | ghik  | 0.0021 | ±0.0003 | kl    | 0.0043 | ±0.0004 | fghi  |
| 1C-TS      | 0.0009 | ±0.0000 | b     | 0.0008 | ±0.0000 | cd    | 0.0015 | ±0.0000 | ef    |
| 1D-TS      | 0.0184 | ±0.0009 | b     | 0.0040 | ±0.0007 | ij    | 0.0030 | ±0.0005 | ijk   |
| 1C-SS      | 0.0226 | ±0.0022 | a     | 0.0146 | ±0.0020 | c     | 0.0056 | ±0.0006 | hi    |
| 1D-SS      | 0.0192 | ±0.0014 | b     | 0.0121 | ±0.0006 | cde   | 0.0056 | ±0.0006 | hi    |
| 2C-TS      | 0.0006 | ±0.0000 | hij   | 0.0006 | ±0.0000 | gh    | 0.0013 | ±0.0000 | def   |
| 2D-TS      | 0.0006 | ±0.0000 | hij   | 0.0004 | ±0.0000 | ijk   | 0.0007 | ±0.0000 | fg    |
| 2C-SS      | 0.0008 | ±0.0000 | k     | 0.0029 | ±0.0005 | ijk   | 0.0041 | ±0.0004 | ij    |
| 2D-SS      | 0.0008 | ±0.0000 | k     | 0.0024 | ±0.0003 | jk    | 0.0032 | ±0.0003 | ijk   |

|            | APX   |       |     |       |       |      |       |       |      |
|------------|-------|-------|-----|-------|-------|------|-------|-------|------|
| Treatments | t0    |       |     | t1    |       |      | t2    |       |      |
| 1C-TM      | 0.664 | ±0.09 | def | 0.534 | ±0.07 | def  | 0.525 | ±0.13 | def  |
| 1D-TM      | 0.664 | ±0.09 | def | 0.572 | ±0.03 | def  | 0.862 | ±0.15 | d    |
| 1C-SM      | 0.400 | ±0.10 | ef  | 0.499 | ±0.05 | def  | 0.554 | ±0.02 | def  |
| 1D-SM      | 0.400 | ±0.10 | ef  | 0.478 | ±0.05 | def  | 0.413 | ±0.08 | ef   |
| 2C-TM      | 0.504 | ±0.04 | def | 0.442 | ±0.03 | def  | 0.381 | ±0.09 | f    |
| 2D-TM      | 0.504 | ±0.04 | def | 0.838 | ±0.28 | de   | 1.324 | ±0.14 | c    |
| 2C-SM      | 2.567 | ±0.20 | a   | 1.451 | ±0.09 | c    | 0.337 | ±0.02 | f    |
| 2D-SM      | 2.567 | ±0.20 | a   | 0.634 | ±0.01 | def  | 2.078 | ±0.31 | b    |
| 1C-TS      | 2.881 | ±0.09 | a   | 1.677 | ±0.07 | bcd  | 0.611 | ±0.07 | fg   |
| 1D-TS      | 2.881 | ±0.09 | a   | 0.650 | ±0.06 | fg   | 0.189 | ±0.01 | g    |
| 1C-SS      | 2.087 | ±0.59 | bc  | 1.352 | ±0.33 | cdef | 0.617 | ±0.08 | fg   |
| 1D-SS      | 2.087 | ±0.59 | bc  | 2.304 | ±0.13 | ab   | 1.282 | ±0.31 | def  |
| 2C-TS      | 0.563 | ±0.07 | fg  | 0.653 | ±0.09 | fg   | 0.905 | ±0.05 | efg  |
| 2D-TS      | 0.563 | ±0.07 | fg  | 1.520 | ±0.50 | bcde | 1.510 | ±0.17 | bcde |
| 2C-SS      | 0.673 | ±0.08 | fg  | 0.643 | ±0.03 | fg   | 0.613 | ±0.08 | fg   |
| 2D-SS      | 0.673 | ±0.08 | fg  | 0.637 | ±0.13 | fg   | 0.744 | ±0.07 | fg   |

|            | POX   |       |     |       |       |       |       |       |       |
|------------|-------|-------|-----|-------|-------|-------|-------|-------|-------|
| Treatments | t0    |       |     | t1    |       |       | t2    |       |       |
| 1C-TM      | 0.200 | ±0.00 | b   | 0.061 | ±0.00 | bc    | 0.108 | ±0.00 | b     |
| 1D-TM      | 0.726 | ±0.20 | b   | 0.579 | ±0.12 | bcde  | 1.089 | ±0.29 | a     |
| 1C-SM      | 0.279 | ±0.03 | def | 0.694 | ±0.09 | b     | 1.295 | ±0.05 | a     |
| 1D-SM      | 0.279 | ±0.03 | def | 0.514 | ±0.08 | bcdef | 0.382 | ±0.09 | bcdef |
| 2C-TM      | 0.029 | ±0.00 | bcd | 0.036 | ±0.00 | bcdef | 0.057 | ±0.00 | bcdef |
| 2D-TM      | 0.029 | ±0.00 | bcd | 0.191 | ±0.00 | bcd   | 0.159 | ±0.00 | bc    |
| 2C-SM      | 0.228 | ±0.01 | ef  | 0.310 | ±0.01 | cdef  | 0.355 | ±0.04 | bcdef |
| 2D-SM      | 0.198 | ±0.03 | f   | 0.270 | ±0.03 | def   | 0.615 | ±0.11 | bcd   |
| 1C-TS      | 1.934 | ±0.20 | ab  | 1.977 | ±0.24 | a     | 1.566 | ±0.03 | abc   |
| 1D-TS      | 1.934 | ±0.20 | ab  | 0.475 | ±0.07 | fgh   | 0.315 | ±0.06 | gh    |
| 1C-SS      | 1.280 | ±0.38 | cde | 0.920 | ±0.21 | ef    | 0.560 | ±0.07 | fgh   |
| 1D-SS      | 1.280 | ±0.38 | cde | 1.471 | ±0.15 | bcd   | 0.606 | ±0.18 | fgh   |
| 2C-TS      | 0.514 | ±0.06 | fgh | 0.825 | ±0.06 | efg   | 1.136 | ±0.14 | cde   |
| 2D-TS      | 0.514 | ±0.06 | fgh | 0.967 | ±0.04 | def   | 1.136 | ±0.14 | cde   |
| 2C-SS      | 0.205 | ±0.02 | h   | 0.309 | ±0.02 | gh    | 0.452 | ±0.05 | fgh   |
| 2D-SS      | 0.205 | ±0.02 | h   | 0.235 | ±0.05 | h     | 0.235 | ±0.01 | h     |

|            | GR    |       |        |       |       |        |       |       |        |
|------------|-------|-------|--------|-------|-------|--------|-------|-------|--------|
| Treatments | t0    |       |        | t1    |       |        | t2    |       |        |
| 1C-TM      | 0.237 | ±0.04 | bc     | 0.162 | ±0.02 | bcdefg | 0.106 | ±0.00 | defg   |
| 1D-TM      | 0.360 | ±0.12 | a      | 0.087 | ±0.01 | efg    | 0.164 | ±0.01 | bcdefg |
| 1C-SM      | 0.085 | ±0.01 | efg    | 0.119 | ±0.01 | cdefg  | 0.152 | ±0.03 | bcdefg |
| 1D-SM      | 0.116 | ±0.02 | ab     | 0.051 | ±0.01 | g      | 0.270 | ±0.04 | cdefg  |
| 2C-TM      | 0.148 | ±0.01 | bcdefg | 0.126 | ±0.01 | cdefg  | 0.068 | ±0.01 | fg     |
| 2D-TM      | 0.235 | ±0.02 | bcd    | 0.183 | ±0.03 | bcdef  | 0.213 | ±0.01 | bcde   |
| 2C-SM      | 0.272 | ±0.06 | ab     | 0.189 | ±0.02 | bcdef  | 0.106 | ±0.02 | defg   |
| 2D-SM      | 0.180 | ±0.02 | ab     | 0.137 | ±0.04 | cdefg  | 0.273 | ±0.02 | bcdefg |
| 1C-TS      | 0.261 | ±0.01 | a      | 0.196 | ±0.02 | bc     | 0.155 | ±0.02 | cd     |
| 1D-TS      | 0.261 | ±0.01 | a      | 0.038 | ±0.00 | g      | 0.047 | ±0.01 | fg     |
| 1C-SS      | 0.121 | ±0.01 | de     | 0.090 | ±0.01 | ef     | 0.052 | ±0.00 | fg     |
| 1D-SS      | 0.121 | ±0.01 | de     | 0.215 | ±0.02 | b      | 0.200 | ±0.03 | bc     |
| 2C-TS      | 0.060 | ±0.00 | fg     | 0.061 | ±0.00 | fg     | 0.062 | ±0.00 | fg     |
| 2D-TS      | 0.060 | ±0.00 | fg     | 0.056 | ±0.01 | fg     | 0.159 | ±0.02 | cd     |
| 2C-SS      | 0.038 | ±0.00 | g      | 0.056 | ±0.00 | fg     | 0.093 | ±0.00 | ef     |
| 2D-SS      | 0.038 | ±0.00 | g      | 0.036 | ±0.01 | g      | 0.036 | ±0.00 | g      |

|            | SOD   |       |    |       |      |     |       |      |     |
|------------|-------|-------|----|-------|------|-----|-------|------|-----|
| Treatments | t0    |       |    | t1    |      |     | t2    |      |     |
| 1C-TM      | 88.6  | ±10.1 | b  | 69.9  | ±4.6 | bcd | 51.2  | ±4.6 | def |
| 1D-TM      | 88.6  | ±10.1 | b  | 40.7  | ±5.6 | f   | 45.6  | ±4.5 | f   |
| 1C-SM      | 82.6  | ±3.4  | bc | 69.7  | ±3.3 | bcd | 56.8  | ±5.0 | def |
| 1D-SM      | 82.6  | ±3.4  | bc | 45.4  | ±4.5 | f   | 41.1  | ±4.9 | f   |
| 2C-TM      | 87.3  | ±7.7  | b  | 64.4  | ±3.8 | ef  | 41.6  | ±1.6 | cde |
| 2D-TM      | 87.3  | ±7.7  | b  | 46.4  | ±5.1 | f   | 64.7  | ±4.3 | cde |
| 2C-SM      | 114.1 | ±8.4  | a  | 80.1  | ±3.7 | bc  | 46.2  | ±3.6 | ef  |
| 2D-SM      | 114.1 | ±8.4  | a  | 67.4  | ±7.2 | cd  | 79.5  | ±6.5 | bc  |
| 1C-TS      | 71.6  | ±4.8  | b  | 68.4  | ±1.4 | b   | 65.2  | ±5.2 | bc  |
| 1D-TS      | 71.6  | ±4.8  | b  | 58.5  | ±5.3 | bc  | 21.8  | ±1.7 | e   |
| 1C-SS      | 66.0  | ±6.3  | bc | 51.1  | ±3.4 | cd  | 36.1  | ±3.7 | de  |
| 1D-SS      | 66.0  | ±6.3  | bc | 112.8 | ±7.0 | a   | 51.2  | ±4.7 | cd  |
| 2C-TS      | 42.3  | ±6.0  | d  | 71.9  | ±4.5 | b   | 101.4 | ±5.1 | a   |
| 2D-TS      | 42.3  | ±6.1  | d  | 38.8  | ±4.6 | d   | 58.0  | ±4.2 | bc  |
| 2C-SS      | 21.6  | ±1.7  | e  | 36.4  | ±3.5 | de  | 51.1  | ±6.2 | cd  |
| 2D-SS      | 21.6  | ±1.7  | e  | 22.9  | ±3.1 | e   | 40.7  | ±4.2 | d   |

|            | TBARS |      |      |      |      |        |       |      |       |
|------------|-------|------|------|------|------|--------|-------|------|-------|
| Treatments | t0    |      |      | t1   |      |        | t2    |      |       |
| 1C-TM      | 33.5  | ±2.0 | ef   | 48.0 | ±1.8 | d      | 62.4  | ±2.4 | c     |
| 1D-TM      | 33.5  | ±2.0 | ef   | 75.4 | ±2.1 | b      | 103.5 | ±4.0 | a     |
| 1C-SM      | 33.9  | ±1.0 | ef   | 45.9 | ±2.1 | d      | 58.0  | ±4.5 | c     |
| 1D-SM      | 33.9  | ±1.0 | ef   | 41.3 | ±4.0 | de     | 77.6  | ±5.1 | b     |
| 2C-TM      | 31.9  | ±3.2 | f    | 27.5 | ±2.0 | fg     | 23.0  | ±1.7 | gh    |
| 2D-TM      | 31.9  | ±3.2 | f    | 44.0 | ±5.2 | d      | 56.5  | ±5.0 | c     |
| 2C-SM      | 13.7  | ±1.4 | i    | 18.8 | ±1.7 | hi     | 23.8  | ±3.0 | gh    |
| 2D-SM      | 13.7  | ±1.4 | i    | 76.6 | ±2.0 | b      | 28.2  | ±1.6 | fg    |
| 1C-TS      | 24.5  | ±1.0 | ghij | 28.0 | ±1.2 | defghi | 31.5  | ±1.7 | defg  |
| 1D-TS      | 25.5  | ±1.1 | ghij | 34.5 | ±2.6 | d      | 65.6  | ±8.3 | a     |
| 1C-SS      | 25.4  | ±1.0 | ghij | 27.2 | ±0.8 | efghi  | 29.1  | ±2.0 | defgh |
| 1D-SS      | 23.8  | ±0.9 | hij  | 26.2 | ±4.2 | ghij   | 57.8  | ±3.5 | b     |
| 2C-TS      | 9.0   | ±0.6 | k    | 21.3 | ±1.4 | ij     | 33.6  | ±3.0 | def   |
| 2D-TS      | 9.0   | ±0.6 | k    | 19.5 | ±1.7 | i      | 41.0  | ±1.7 | c     |
| 2C-SS      | 9.4   | ±0.8 | k    | 21.6 | ±0.6 | ij     | 33.8  | ±1.4 | de    |
| 2D-SS      | 9.4   | ±0.8 | k    | 26.8 | ±1.6 | fghi   | 46.3  | ±2.2 | c     |

| Treatments | Chl.a |       |      |       |       |      |       |       |      |
|------------|-------|-------|------|-------|-------|------|-------|-------|------|
|            | t0    |       |      | t1    |       |      | t2    |       |      |
| 1C-TM      | 1.108 | ±0.05 | hi   | 1.530 | ±0.16 | def  | 1.833 | ±0.23 | bc   |
| 1D-TM      | 1.108 | ±0.05 | hi   | 2.273 | ±0.12 | a    | 1.334 | ±0.11 | efgh |
| 1C-SM      | 1.654 | ±0.05 | cd   | 1.560 | ±0.05 | de   | 1.117 | ±0.02 | hi   |
| 1D-SM      | 1.654 | ±0.05 | cd   | 1.493 | ±0.02 | def  | 1.043 | ±0.07 | i    |
| 2C-TM      | 0.762 | ±0.00 | j    | 1.029 | ±0.08 | i    | 1.163 | ±0.00 | ghi  |
| 2D-TM      | 0.762 | ±0.00 | j    | 1.895 | ±0.10 | bc   | 1.477 | ±0.09 | def  |
| 2C-SM      | 1.257 | ±0.00 | fghi | 1.348 | ±0.02 | efgh | 1.440 | ±0.04 | def  |
| 2D-SM      | 1.257 | ±0.00 | fghi | 1.986 | ±0.08 | b    | 1.395 | ±0.01 | defg |
| 1C-TS      | 1.049 | ±0.02 | de   | 1.316 | ±0.01 | b    | 1.597 | ±0.01 | a    |
| 1D-TS      | 1.049 | ±0.02 | de   | 1.116 | ±0.01 | cd   | 1.636 | ±0.10 | a    |
| 1C-SS      | 1.118 | ±0.04 | cd   | 1.221 | ±0.01 | bc   | 1.335 | ±0.03 | b    |
| 1D-SS      | 1.118 | ±0.04 | cd   | 0.927 | ±0.03 | efg  | 1.605 | ±0.06 | a    |
| 2C-TS      | 0.653 | ±0.06 | i    | 0.772 | ±0.04 | ghi  | 0.890 | ±0.03 | efgh |
| 2D-TS      | 0.653 | ±0.06 | i    | 0.809 | ±0.05 | fgh  | 0.764 | ±0.03 | hi   |
| 2C-SS      | 1.034 | ±0.04 | de   | 0.942 | ±0.04 | ef   | 0.849 | ±0.06 | fgh  |
| 2D-SS      | 1.034 | ±0.04 | de   | 0.941 | ±0.00 | ef   | 0.622 | ±0.02 | i    |

|            | Chl.b |       |      |       |       |      |       |       |      |
|------------|-------|-------|------|-------|-------|------|-------|-------|------|
| Treatments | t0    |       |      | t1    |       |      | t2    |       |      |
| 1C-TM      | 0.283 | ±0.01 | defg | 0.343 | ±0.03 | bcd  | 0.346 | ±0.06 | bcd  |
| 1D-TM      | 0.283 | ±0.01 | defg | 0.404 | ±0.02 | ab   | 0.266 | ±0.01 | fg   |
| 1C-SM      | 0.425 | ±0.01 | a    | 0.228 | ±0.01 | g    | 0.119 | ±0.00 | h    |
| 1D-SM      | 0.425 | ±0.01 | a    | 0.323 | ±0.00 | efg  | 0.273 | ±0.02 | cdef |
| 2C-TM      | 0.164 | ±0.00 | h    | 0.246 | ±0.01 | g    | 0.264 | ±0.00 | fg   |
| 2D-TM      | 0.164 | ±0.00 | h    | 0.377 | ±0.03 | abc  | 0.140 | ±0.00 | h    |
| 2C-SM      | 0.315 | ±0.00 | cdef | 0.325 | ±0.00 | cdef | 0.335 | ±0.00 | cde  |
| 2D-SM      | 0.315 | ±0.00 | cdef | 0.403 | ±0.01 | ab   | 0.283 | ±0.01 | defg |
| 1C-TS      | 0.290 | ±0.00 | defg | 0.334 | ±0.00 | bcd  | 0.377 | ±0.00 | b    |
| 1D-TS      | 0.290 | ±0.00 | defg | 0.350 | ±0.00 | bc   | 0.525 | ±0.04 | a    |
| 1C-SS      | 0.317 | ±0.01 | cde  | 0.324 | ±0.00 | cde  | 0.328 | ±0.01 | bcd  |
| 1D-SS      | 0.317 | ±0.01 | cde  | 0.315 | ±0.01 | cde  | 0.550 | ±0.03 | a    |
| 2C-TS      | 0.239 | ±0.01 | g    | 0.260 | ±0.01 | fg   | 0.282 | ±0.01 | defg |
| 2D-TS      | 0.239 | ±0.01 | g    | 0.273 | ±0.01 | efg  | 0.246 | ±0.00 | g    |
| 2C-SS      | 0.336 | ±0.01 | bcd  | 0.320 | ±0.01 | cde  | 0.304 | ±0.01 | cdef |
| 2D-SS      | 0.336 | ±0.01 | bcd  | 0.321 | ±0.00 | cde  | 0.254 | ±0.00 | fg   |

|            | Tot.Chl |       |       |       |       |       |       |       |      |
|------------|---------|-------|-------|-------|-------|-------|-------|-------|------|
| Treatments | t0      |       |       | t1    |       |       | t2    |       |      |
| 1C-TM      | 1.391   | ±0.06 | efgh  | 1.873 | ±0.20 | cd    | 2.179 | ±0.29 | b    |
| 1D-TM      | 1.391   | ±0.06 | efgh  | 2.677 | ±0.14 | a     | 1.599 | ±0.12 | defg |
| 1C-SM      | 2.078   | ±0.06 | bc    | 1.788 | ±0.05 | cd    | 1.236 | ±0.02 | h    |
| 1D-SM      | 2.078   | ±0.06 | bc    | 1.817 | ±0.02 | cd    | 1.317 | ±0.07 | fgh  |
| 2C-TM      | 0.927   | ±0.01 | i     | 1.275 | ±0.10 | gh    | 1.426 | ±0.00 | efgh |
| 2D-TM      | 0.927   | ±0.01 | i     | 2.272 | ±0.10 | b     | 1.617 | ±0.10 | def  |
| 2C-SM      | 1.572   | ±0.00 | defg  | 1.673 | ±0.02 | de    | 1.774 | ±0.05 | cd   |
| 2D-SM      | 1.572   | ±0.00 | defg  | 2.389 | ±0.09 | b     | 1.678 | ±0.01 | de   |
| 1C-TS      | 1.340   | ±0.03 | cdefg | 1.650 | ±0.01 | b     | 1.974 | ±0.01 | a    |
| 1D-TS      | 1.340   | ±0.03 | cdefg | 1.466 | ±0.01 | bcd   | 2.160 | ±0.19 | a    |
| 1C-SS      | 1.434   | ±0.06 | cde   | 1.545 | ±0.02 | bc    | 1.662 | ±0.04 | b    |
| 1D-SS      | 1.434   | ±0.06 | cde   | 1.241 | ±0.05 | efgh  | 2.155 | ±0.08 | a    |
| 2C-TS      | 0.892   | ±0.08 | jk    | 1.032 | ±0.05 | ijk   | 1.172 | ±0.04 | fghi |
| 2D-TS      | 0.892   | ±0.08 | jk    | 1.082 | ±0.06 | hij   | 1.011 | ±0.03 | ijk  |
| 2C-SS      | 1.370   | ±0.05 | cdef  | 1.261 | ±0.06 | defgh | 1.153 | ±0.08 | ghi  |
| 2D-SS      | 1.370   | ±0.05 | cdef  | 1.261 | ±0.00 | defgh | 0.876 | ±0.02 | k    |

|            | Tot.Carotenoid |       |       |       |       |        |       |       |        |
|------------|----------------|-------|-------|-------|-------|--------|-------|-------|--------|
| Treatments | t0             |       |       | t1    |       |        | t2    |       |        |
| 1C-TM      | 0.180          | ±0.02 | cdefg | 0.186 | ±0.02 | bcdefg | 0.193 | ±0.03 | abcdef |
| 1D-TM      | 0.180          | ±0.02 | cdefg | 0.236 | ±0.03 | abc    | 0.236 | ±0.02 | ab     |
| 1C-SM      | 0.217          | ±0.00 | abcde | 0.208 | ±0.00 | abcdef | 0.170 | ±0.00 | efghi  |
| 1D-SM      | 0.217          | ±0.00 | abcde | 0.227 | ±0.02 | abcd   | 0.220 | ±0.02 | abcde  |
| 2C-TM      | 0.126          | ±0.00 | hi    | 0.137 | ±0.00 | ghi    | 0.121 | ±0.00 | i      |
| 2D-TM      | 0.126          | ±0.00 | hi    | 0.239 | ±0.02 | ab     | 0.242 | ±0.01 | a      |
| 2C-SM      | 0.177          | ±0.00 | defgh | 0.155 | ±0.00 | fghi   | 0.156 | ±0.00 | fghi   |
| 2D-SM      | 0.177          | ±0.00 | defgh | 0.243 | ±0.00 | a      | 0.210 | ±0.01 | abcde  |
| 1C-TS      | 0.110          | ±0.00 | defg  | 0.125 | ±0.00 | d      | 0.153 | ±0.00 | c      |
| 1D-TS      | 0.110          | ±0.00 | defg  | 0.121 | ±0.00 | d      | 0.196 | ±0.01 | b      |
| 1C-SS      | 0.106          | ±0.00 | defgh | 0.109 | ±0.00 | defg   | 0.113 | ±0.00 | def    |
| 1D-SS      | 0.106          | ±0.00 | defgh | 0.118 | ±0.00 | de     | 0.220 | ±0.00 | a      |
| 2C-TS      | 0.082          | ±0.00 | i     | 0.085 | ±0.00 | ij     | 0.087 | ±0.00 | ij     |
| 2D-TS      | 0.082          | ±0.00 | i     | 0.090 | ±0.00 | hij    | 0.091 | ±0.00 | ghij   |
| 2C-SS      | 0.107          | ±0.00 | defg  | 0.102 | ±0.00 | efghi  | 0.097 | ±0.00 | fghij  |
| 2D-SS      | 0.107          | ±0.00 | defg  | 0.109 | ±0.00 | defg   | 0.124 | ±0.00 | d      |

#### Description of the Treatments:

|                                 |  |  |
|---------------------------------|--|--|
| 1: 25 °C                        |  |  |
| 2: 35 °C                        |  |  |
| <b>TM:</b> Tolerant Maize       |  |  |
| <b>SM:</b> Sensitive Maize      |  |  |
| <b>TS:</b> Tolerant Sunflower   |  |  |
| <b>SS:</b> Sensitive Sunflower  |  |  |
| <b>C:</b> Control/ well-watered |  |  |
| <b>D:</b> Drought               |  |  |
