# Supplementary material for: Lipid Peroxidation and Chlorophyll Fluorescence of Photosystem II Performance during Drought and Heat Stress is Associated with the Antioxidant Capacities of C3 Sunflower and C4 Maize Varieties
Source: MDPI journal article supplement (doi:10.3390/ijms21144846), 2020-07-09
Supplement: s1 [file s1]

**Killi et al.** “Lipid peroxidation and chlorophyll fluorescence of photosystem II performance during drought and heat stress is associated with the antioxidant capacities of C3 sunflower and C4 maize varieties”

## Supplementary Information S1.

**Table S1** Chlorophyll *a* fluorescence parameters used in the fluorescence transient analysis

| <i>Technical fluorescence parameters</i> |                                                                                                                                                                                                                                                                                                                                                                                                                                                                                                                                                                                                                                                                                                                                                                                                                                                                                                                         |
|------------------------------------------|-------------------------------------------------------------------------------------------------------------------------------------------------------------------------------------------------------------------------------------------------------------------------------------------------------------------------------------------------------------------------------------------------------------------------------------------------------------------------------------------------------------------------------------------------------------------------------------------------------------------------------------------------------------------------------------------------------------------------------------------------------------------------------------------------------------------------------------------------------------------------------------------------------------------------|
| <b>F<sub>t</sub></b>                     | Fluorescence emission from a dark-adapted leaf at the time <i>t</i>                                                                                                                                                                                                                                                                                                                                                                                                                                                                                                                                                                                                                                                                                                                                                                                                                                                     |
| <b>F<sub>0</sub></b>                     | Minimal fluorescence from a dark-adapted leaf                                                                                                                                                                                                                                                                                                                                                                                                                                                                                                                                                                                                                                                                                                                                                                                                                                                                           |
| <b>F<sub>M</sub></b>                     | Maximal fluorescence from a dark-adapted leaf                                                                                                                                                                                                                                                                                                                                                                                                                                                                                                                                                                                                                                                                                                                                                                                                                                                                           |
| <b>F<sub>J</sub></b>                     | Fluorescence intensity at the J-step (at 2 ms)                                                                                                                                                                                                                                                                                                                                                                                                                                                                                                                                                                                                                                                                                                                                                                                                                                                                          |
| <b>F<sub>I</sub></b>                     | Fluorescence intensity at the I-step (at 30 ms)                                                                                                                                                                                                                                                                                                                                                                                                                                                                                                                                                                                                                                                                                                                                                                                                                                                                         |
| <b>F<sub>V</sub></b>                     | Maximal variable fluorescence from a dark-adapted leaf. $F_V = F_M - F_0$                                                                                                                                                                                                                                                                                                                                                                                                                                                                                                                                                                                                                                                                                                                                                                                                                                               |
| <b>V<sub>J</sub></b>                     | Relative variable fluorescence at 3ms. $V_J = (F_{2ms} - F_0) / (F_M - F_0)$                                                                                                                                                                                                                                                                                                                                                                                                                                                                                                                                                                                                                                                                                                                                                                                                                                            |
| <b>V<sub>I</sub></b>                     | Relative variable fluorescence at 30ms. $V_I = (F_{30ms} - F_0) / (F_M - F_0)$                                                                                                                                                                                                                                                                                                                                                                                                                                                                                                                                                                                                                                                                                                                                                                                                                                          |
| <b>M<sub>0</sub></b>                     | Slope of the curve at the origin of the fluorescence rise. It is a measure of the rate of the primary photochemistry. $M_0 = 4(F_{300\mu s} - F_0) / (F_M - F_0)$                                                                                                                                                                                                                                                                                                                                                                                                                                                                                                                                                                                                                                                                                                                                                       |
| <i>Derived parameters</i>                |                                                                                                                                                                                                                                                                                                                                                                                                                                                                                                                                                                                                                                                                                                                                                                                                                                                                                                                         |
| <b><math>F_v/F_m =</math></b>            | $[F_m - F_0]/F_m = \phi_{Po} = TR_0/ABS =$ maximum quantum yield of PSII primary photochemistry, measured in samples in dark-adapted state. $F_v/F_m$ expresses the probability that an absorbed photon will be trapped by the PSII reaction centre.                                                                                                                                                                                                                                                                                                                                                                                                                                                                                                                                                                                                                                                                    |
| <b><math>\Psi_{Eo} =</math></b>          | $ET_0/TR_0 = 1 - V_J = 1 - (F_{2ms} - F_0) / (F_m - F_0)$ . $\Psi_{Eo}$ expresses the probability that the energy of a trapped excitation is used for electron transport beyond Q <sub>A</sub> . $V_J$ represents the relative variable fluorescence at 2 ms (step-J) ( $V_J = (F_J - F_0) / (F_m - F_0)$ ).                                                                                                                                                                                                                                                                                                                                                                                                                                                                                                                                                                                                            |
| <b><math>\Delta V_{I-P} =</math></b>     | $1 - V_I = (F_m - F_{30ms}) / (F_m - F_0)$ , I-P phase (Oukarroum et al., 2009). This parameter indicates relative contribution of the I-P phase to the fluorescence transient OJIP; it is regarded as a measure of the efficiency of electron flux through PSI to reduce the final acceptors of the electron transport chain, i.e. ferredoxin and NADP. $V_I$ indicates the relative variable fluorescence at 30 ms (step-I) ( $V_I = (F_I - F_0) / (F_m - F_0)$ ).                                                                                                                                                                                                                                                                                                                                                                                                                                                    |
| <b>RC/ABS=</b>                           | $(1 - (F_o/F_m)) / (M_0/V_J) = \phi_{Po} (V_J/M_0)$ . This parameter represents the total number of active reaction center per absorption. $M_0 = 4(F_{300\mu s} - F_0) / (F_m - F_0)$ . $M_0$ represents the initial slope of the double normalised fluorescence induction curve, and is a proxy of the net rate of PSII closure.                                                                                                                                                                                                                                                                                                                                                                                                                                                                                                                                                                                      |
| <b>PI<sub>abs</sub> =</b>                | $(RC/ABS) [\phi_{Po} / (1 - \phi_{Po})] [\Psi_{Eo} / (1 - \Psi_{Eo})]$ . Performance index on absorption bases; absorption of antenna Chls of PSII. This measure incorporates photochemical and non-photochemical processes, such as absorption and trapping of excitation energy, electron transport beyond the primary plastoquinone (QA) and dissipation of excess excitation energy.                                                                                                                                                                                                                                                                                                                                                                                                                                                                                                                                |
| <b>PI<sub>tot</sub>=</b>                 | Performance Index total (PI <sub>tot</sub> ) is the potential for energy conservation from photons absorbed by PSII to the reduction flux (RE) of PSI end acceptors. The PI <sub>tot</sub> is a multi-parametric indicator of four measures of photosynthetic electron transport: (1) the concentration of reaction centres; (2) the quantum yield of PSII photochemistry; (3) the capacity for uptake of electrons in the electron chain between PSII and PSI; (4) the efficiency with which an electron can transfer from the reduced intersystem electron acceptors to the PSI end electron (Strasser et al., 2010, 2004; Tsimilli-Michael and Strasser, 2008).<br>$PI_{TOT} = PI_{ABS} [\delta_{Ro} / (1 - \delta_{Ro})]$ where $\delta_{Ro} = (1 - V_J) / (1 - V_I) = (F_m - F_I) / (F_m - F_J)$ .<br>$\delta_{Ro}$ is the efficiency of an electron can transport from a reduced PQ to PSI end electron acceptor. |

---

|                    |                                                                                                                                                                                                                                                                                                              |
|--------------------|--------------------------------------------------------------------------------------------------------------------------------------------------------------------------------------------------------------------------------------------------------------------------------------------------------------|
| <b>K-band=</b>     | $V_{OJ300} = (F_{300\ \mu s} - F_o) / (F_J - F_o)$ . K band indicate relative variable fluorescence at 300 $\mu s$ (transient normalized between $F_o$ and $F_K$ ). This parameter express the breakdown of the oxygen-evolving system (Srivastava et al., 1997).                                            |
| <b>ChlF steps=</b> | The ChlF induction phase has different time steps called as: 20–50 $\mu s$ (O-step), 2 ms (J-step), 30 ms (I-step), around 0.8 s (P-step; peak) and generally denoted $F_o$ , $F_J$ and $F_I$ . The last step (P-step) indicates the highest fluorecence intensity ( $F_m$ ), when saturating light is used. |

---
