# Supplementary figures and images for: Lipid Peroxidation and Chlorophyll Fluorescence of Photosystem II Performance during Drought and Heat Stress is Associated with the Antioxidant Capacities of C3 Sunflower and C4 Maize Varieties
Source: MDPI journal article supplement (doi:10.3390/ijms21144846), 2020-07-09

# Supplementary Data S2

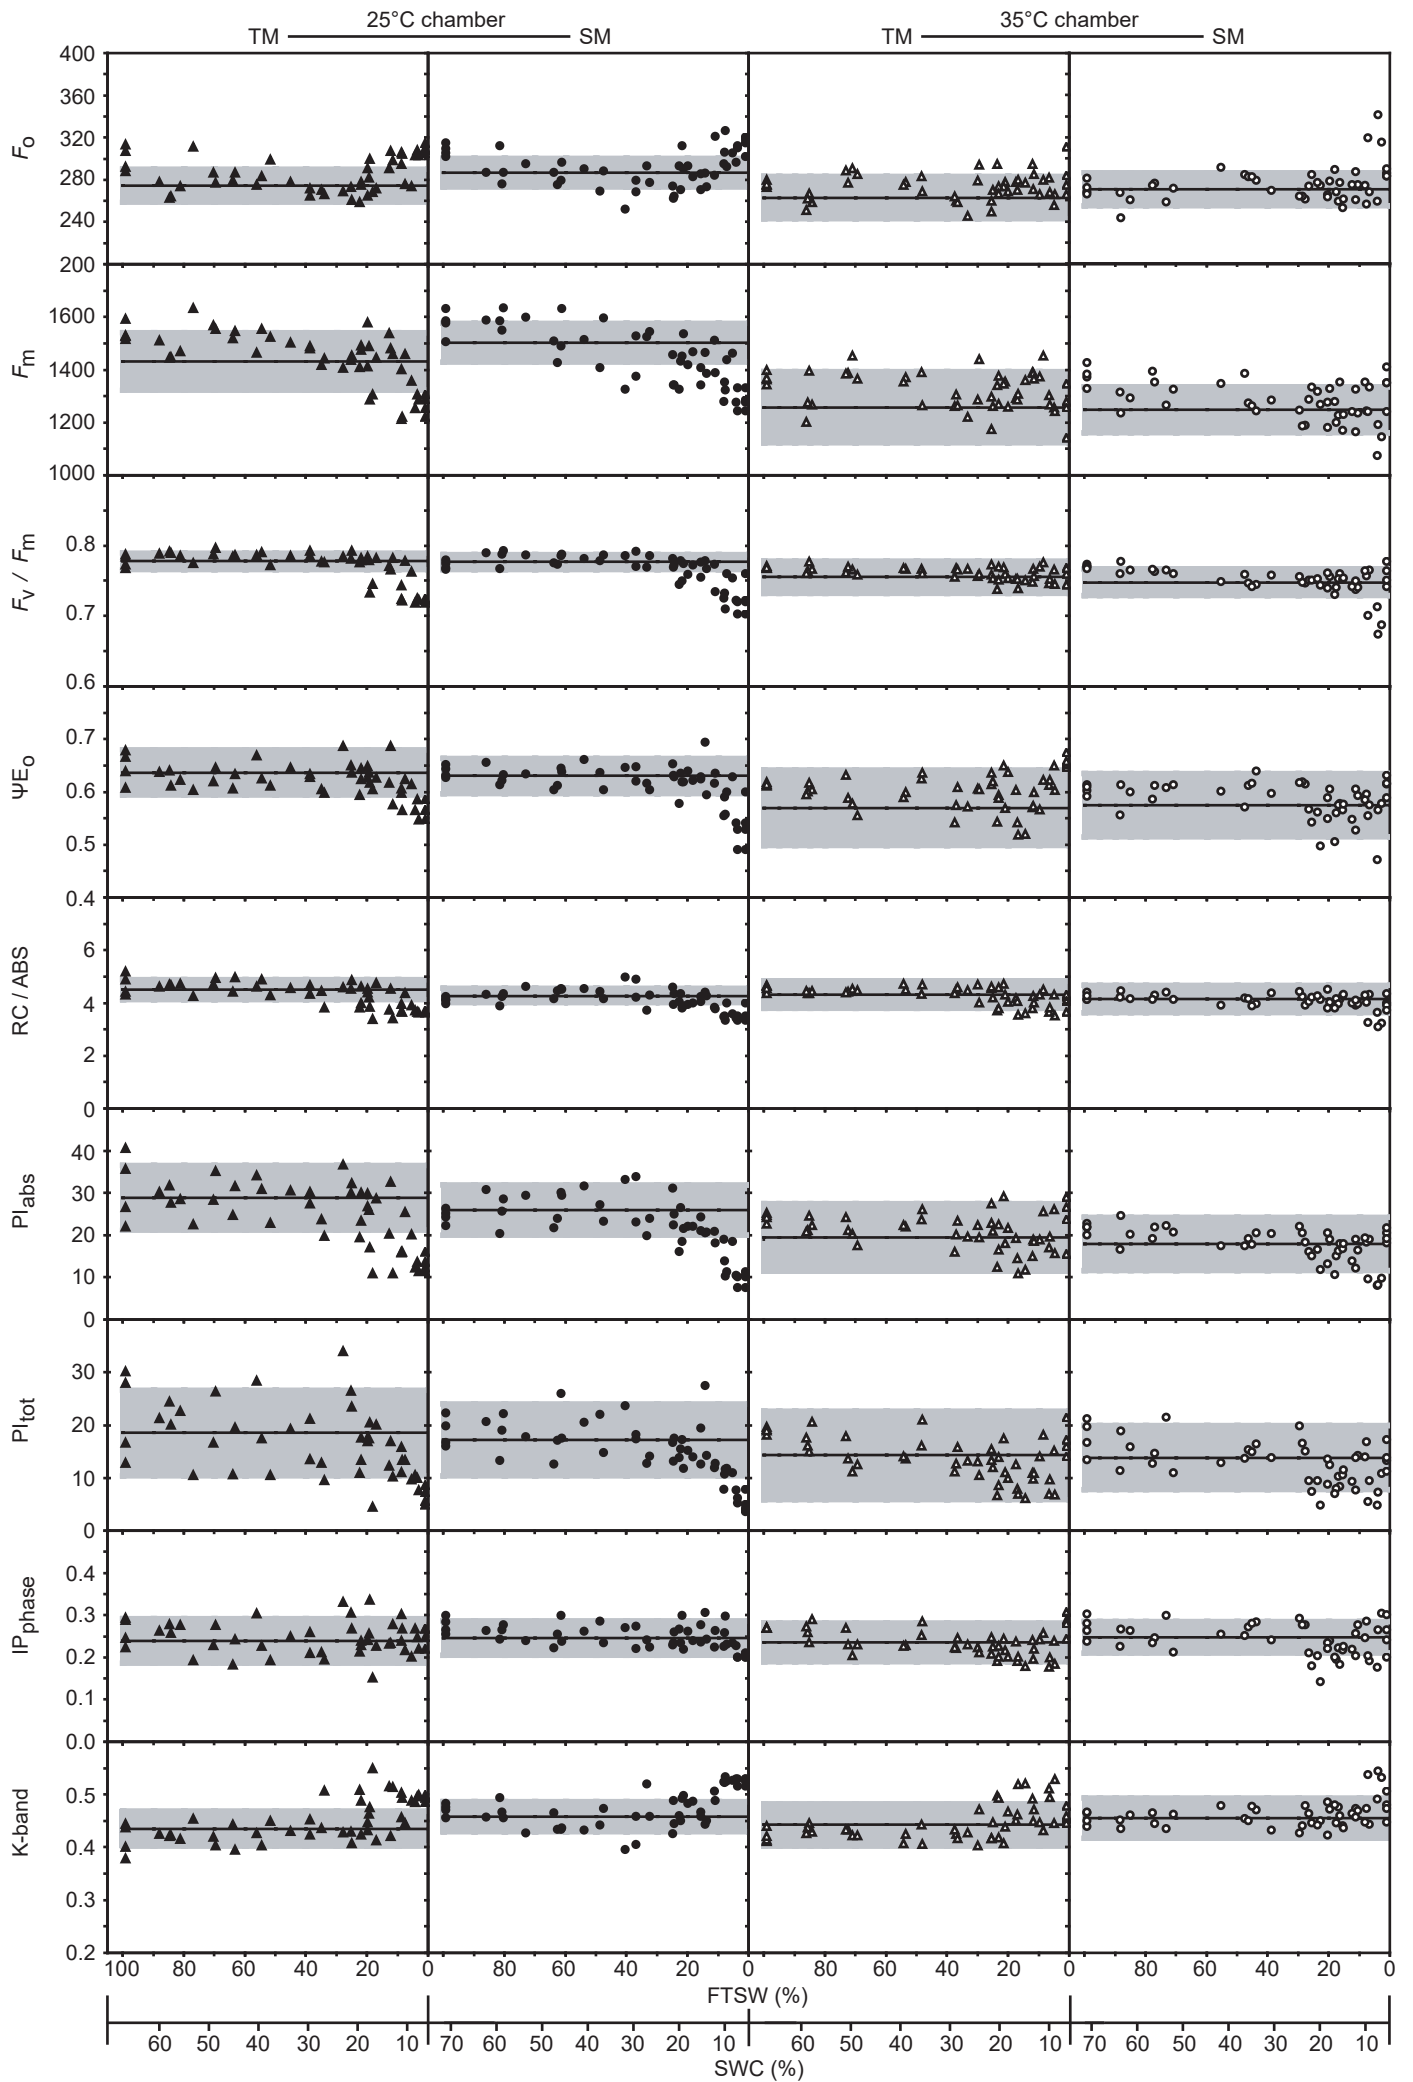

Supplement: s1 [file s1]

# Supplementary Data S1

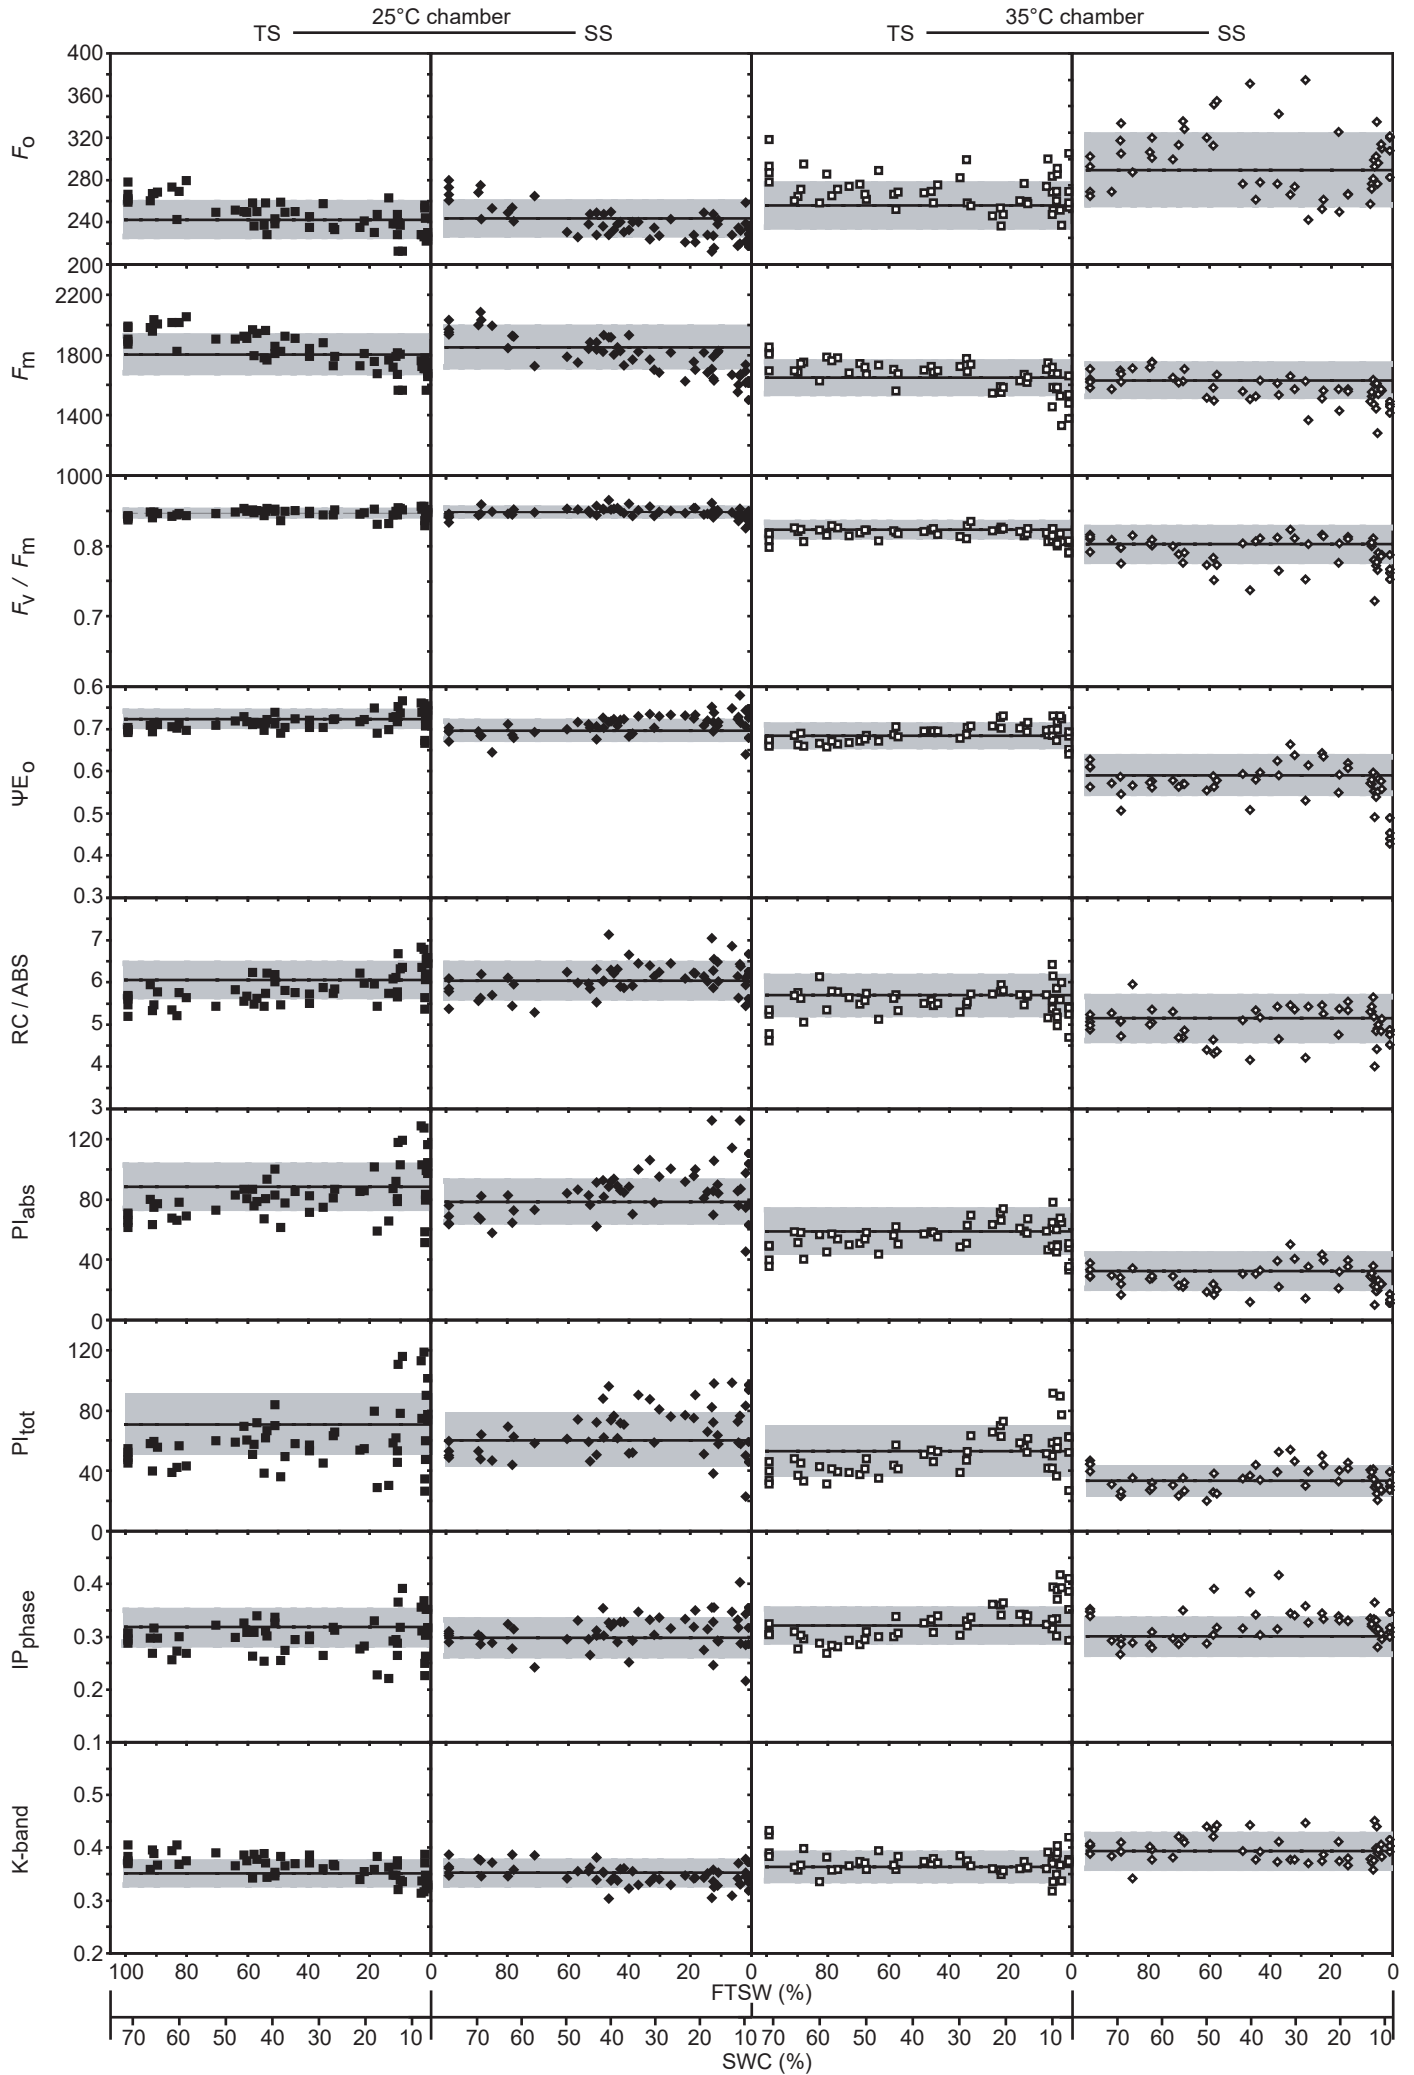

Supplement: s1 [file s1]
